# Supplementary material for: Soil Metaproteomics for the Study of the Relationships Between Microorganisms and Plants: A Review of Extraction Protocols and Ecological Insights
Source: PubMed Central journal article supplement (PMC7697097; doi:10.3390/ijms21228455), 2020-11-11
Supplement: ijms-21-08455-s001.pdf [file ijms-21-08455-s001.pdf]

| Reference                 | Physics cell lysis                                                        | Crucial aspects of the proposed extraction protocol                                                                                                                                                                                                                                                                                         | Advances                                                                                                                                                                                                              | Disadvantages                                                                                                                           |
|---------------------------|---------------------------------------------------------------------------|---------------------------------------------------------------------------------------------------------------------------------------------------------------------------------------------------------------------------------------------------------------------------------------------------------------------------------------------|-----------------------------------------------------------------------------------------------------------------------------------------------------------------------------------------------------------------------|-----------------------------------------------------------------------------------------------------------------------------------------|
| Ogunseitan et al.(1993)   | Boiling method<br><br>Freeze-thaw method                                  | 1:1 water and extraction buffer (100 mM TrisHCl pH 6.8, 200 mM dithiothreitol, 4% sodium dodecyl sulfate (SDS), 20% glycerol, and 0.2% bromophenol blue)<br><br>1:1 water and extraction buffer (50 mM Tris-HCl (pH 7.6), 10% sucrose, 1 mM dithiothreitol (DTT)), lysozyme (600 ug / ml), EDTA (2 mM), 0.2% polyoxyethylene 20 cetyl ether | Both protocols allow direct extraction of extracellular and intracellular proteins                                                                                                                                    | Reduced quantity of extracted proteins (1-5 µg/gboiling method, 20-50µg/g freeze method);<br><br>Co-extraction of humic substances      |
| Criquet et al. (2002)     | –                                                                         | Comparison between different extraction protocols (distilled water, four salt solutions CaCl <sub>2</sub> , KCl, NaCl and Na <sub>2</sub> SO and five pH 6 buffers (succinate, bis-TRIS, PO <sub>3</sub> –4, pyrophosphate, citrate). Protein concentration with dialysing membrane and PEG (15–20 kDa)                                     | Extraction from forest litter<br>The protocol proposes strategies to limit the co-extraction of humic substances                                                                                                      | No SDS-PAGE and mass spectrometry analysis performed                                                                                    |
| Murase et al. (2003)      | –                                                                         | 67 mM phosphate buffer at various pH precipitation with TCA washes with ethanol and diethyl ether                                                                                                                                                                                                                                           | The protocol showed that the increase in the extraction buffer pH corresponds to the increase in the co-extraction of interfering substances. The obtained pellet can be used for SDS-PAGE and subsequent sequencing. | Extraction limited to extracellular proteins only;<br><br>Large quantities of sample required;<br><br>SOM co-extraction                 |
| Singleton et al. (2003)   | Liquid nitrogen<br><br>Bead beating                                       | Ogunseitan et al.(1993) modified: 50 mm TRIS-HCl, 2 mm DTT, 4 mM EDTA, 0.1% Brij 58 (pH 7.6)                                                                                                                                                                                                                                                | Cell lysis with liquid nitrogen allows to extract 32% more proteins than the “bead beating” method                                                                                                                    | Few protein bands detected in SDS-PAGE                                                                                                  |
| Schulze et al. (2005)     | –                                                                         | Soil solution collected with suction plates and filtered with 0.2-µm acetate filter membrane, removal of DOM with sodium polytungstate, and 10% HF.                                                                                                                                                                                         | The proteins extracted from the solution sucked from the soil is rapid and compatible with proteomic analyzes                                                                                                         | Extraction is limited to extracellular proteins isolated from DOM only                                                                  |
| Benndorf et al.(2007)     | –                                                                         | Incubation in NaOH and phenolic extraction (Wang et al., 2003)                                                                                                                                                                                                                                                                              | The use of phenol allows to remove DNA and RNA that negatively influence protein extraction                                                                                                                           | Phenol is a dangerous and difficult to handle compound<br>Co-extraction of humic acids                                                  |
| Masciandaro et al. (2008) | –                                                                         | Chloroform fumigation-extraction method (Hofman and Dusek, 2003)<br>Comparison between different buffers:<br>0.1 m sodium pyrophosphate pH 7.0;<br>67 mM phosphate buffer (pH 6.0);<br>0.5 m potassium sulphate (pH 6.6).<br>PVPP and membranes to remove interfering substances                                                            | Intra and extracellular protein extraction<br>Correlation between the type of buffer used and the type and quantity of protein extracted                                                                              | Co-extraction of humic substances that adversely effect on the SDS-PAGE<br>no identification of proteins extracted by mass spectrometry |
| Chen et al.(2009)         | 1h homogenization and incubation in the extractive buffers under stirring | “C-S-P-M method” 0.05 M citrate pH 8, SDS buffer (1% w / v SDS, 0.1M Tris-HCl, pH 6.8, 20mM DTT) followed by a classic phenol extraction (Wang et al.2003)                                                                                                                                                                                  | The combination of SDS buffer and phenolic extraction gave good results for the removal of the humic substance                                                                                                        | Not applicable for deep proteome studies<br>reduced number of proteins extracted<br>low resolution of 2-DE separation                   |
| Chourey et al. (2010)     | Boiling bath                                                              | Alkaline-SDS buffer (5% SDS, 50 mM Tris-HCl, pH 8.5; 0.15 M NaCl; 0.1 mM EDTA; 1 mM MgCl <sub>2</sub> ; 50 mM Dithiothreitol (DTT)), Trichloroacetic acid (TCA)                                                                                                                                                                             | Large number of extracted protein                                                                                                                                                                                     | Tested only on soils inoculated with bacteria                                                                                           |

|                           |                                             |                                                                                                                                                                                        |                                                                                                                                                            |                                                                                                                                                  |
|---------------------------|---------------------------------------------|----------------------------------------------------------------------------------------------------------------------------------------------------------------------------------------|------------------------------------------------------------------------------------------------------------------------------------------------------------|--------------------------------------------------------------------------------------------------------------------------------------------------|
|                           |                                             | overnight precipitation                                                                                                                                                                |                                                                                                                                                            |                                                                                                                                                  |
| Wang et al. (2011)        |                                             | “C/S-P-M method”, the sequential citrate and SDS buffer extractions (Chen et al.,2009) is replaced by a single treatment of the two buffers                                            | Decreased time required for extraction<br>Increased number of extracted proteins<br>Good degree of reproducibility                                         | co-extraction of humic acids visible on the SDS PAGE                                                                                             |
| Keiblinger et al. (2012b) | –                                           | Comparison between 4 extractive protocols<br>SDS buffer,<br>NaOH + phenol extraction,<br>SDS buffer + phenol extraction,<br>Washing steps, SDS buffer + phenol extraction              | SDS buffer followed by extraction with phenol allowed the extraction of a greater number of proteins                                                       | Use of harmful substances (phenol)<br>co-extraction of interfering substances                                                                    |
| Nicora et al. (2013)      | –                                           | Soil pre-treatment with amino acid mixture, desorption buffer, SDS-TCA acetone extraction                                                                                              | Compatible with protein extraction, tryptic digestion and mass spectrometric analysis<br>Increase protein identifications                                  | The effectiveness of the protocol varies according to the type of soil                                                                           |
| Quian et al. (2017)       | –                                           | Detergent based extraction buffer (SDS), precipitation in trichloroacetic acid (TCA) ,filtration at 10 kDa (pH 2 ~ 3)                                                                  | Qualitative improvement of extracted proteins<br>protocol compatible with subsequent proteomic analysis<br>reduced co-extraction of interfering substances | Proteolytic peptides of microorganism mixture were added to the soil samples                                                                     |
| Greenfield et al. (2018)  | –                                           | <sup>14</sup> C-labeled soluble proteins incubated in soil and then extracted with different solutions to evaluate the best combination                                                | Good recovery with NaOH (0.1 M; 61–80%) and Na-pyrophosphate (0.05 M, pH 7.0; 45–75%)                                                                      | Specific protocol for water-soluble proteins only                                                                                                |
| Callister et al.(2018)    | Beads mix/Sonication                        | Folk et al.(1951) midified:<br>2:1 chloroform:methanol<br>SDS-Tris buffer<br>20% trichloroacetic                                                                                       | Suitable for 1D LC-MS/MS and 2D LC-MS/MS                                                                                                                   | Poor reproducibility<br>Laborius protocol                                                                                                        |
| Mandalakis et al. (2018)  | TissueLyser II (Qiagen, Venlo, Netherlands) | Protocol for DNA extraction readapted (Dong et al. 2006)<br>Flocculation of humic substances with trivalent aluminum ion Al <sup>3+</sup>                                              | Non-toxic, inexpensive and viable approach                                                                                                                 | Pellet of <i>P. putida</i> cells added to the soil sample                                                                                        |
| Renu et al. (2019)        | Liquid nitrogen                             | Optimization of Keiblinger et al., 2012 and Benndorf et al., 2007 protocols.<br>Extraction buffer (1:1 (v/v) phenol (pH 8.0) and SDS phenol buffer (50 mM Tris, 1% SDS, pH 7.5) + PVPP | Good number of peptides identified by mass spectrometry                                                                                                    | Use of harmful substances (phenol)<br>co-extraction of interfering substances<br><br>Poor quantity and quality of the bands obtained on SDS page |

Table S1: Advances and disadvantages of the main extractive protocols
